# Supplementary material for: Open-ended W18O49-filled tungsten dichalcogenide nanotubes grown on a W substrate to efficiently catalyze hydrogen evolution
Source: Royal Society of Chemistry journal article supplement (doi:10.1039/d1na00571e), 2021-01-01
Supplement: d1na00571e1.pdf [file d1na00571e1.pdf]

Supporting Information for

## Open-ended $W_{18}O_{49}$ -filled Tungsten Dichalcogenides Nanotubes Grown on W Substrate to Efficiently Catalyze Hydrogen Evolution

Yubao Li,\* Wei Zhang,\* Tianqi Wang, Yating Cao, Cuncai Lv and Kai Zhang

College of Physics Science and Technology, Hebei University, Baoding 071002, China

\*Corresponding authors. E-mail: liyubao@hbu.edu.cn; zhangw@hbu.edu.cn

### Supplementary Figures

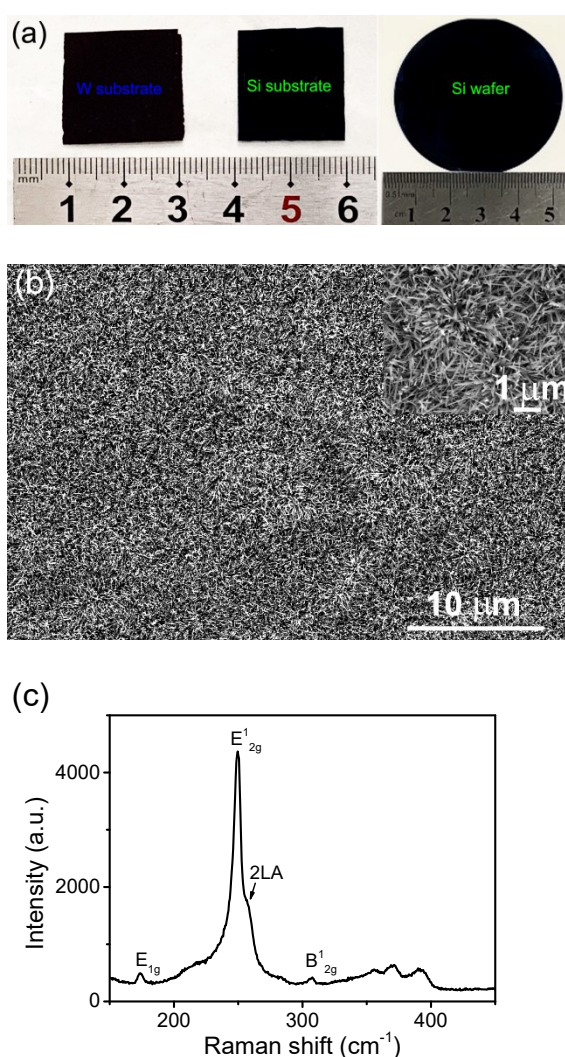

**Fig. S1** (a) Photos of WSe<sub>2</sub>-based one-dimensional nanostructure films grown on 2 cm-sized W substrate (left)/Si substrate (mid), or 2-inch Si wafer (right), (b) SEM image of WSe<sub>2</sub>-based one-dimensional nanostructure films grown on a W substrate, (c) Raman spectrum of WSe<sub>2</sub>-based one-dimensional nanostructured film.

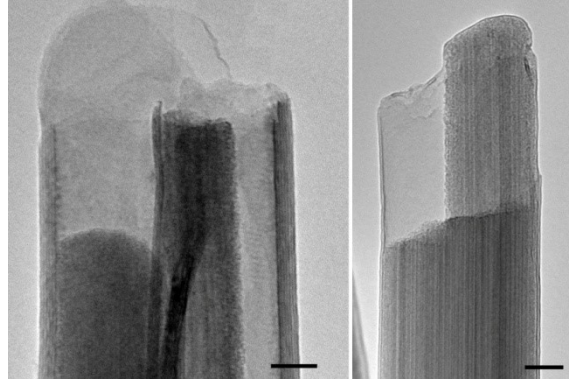

**Fig. S2** HRTEM images of  $\text{WS}_2$  uncapped nanotubes (scale bars: 10 nm)

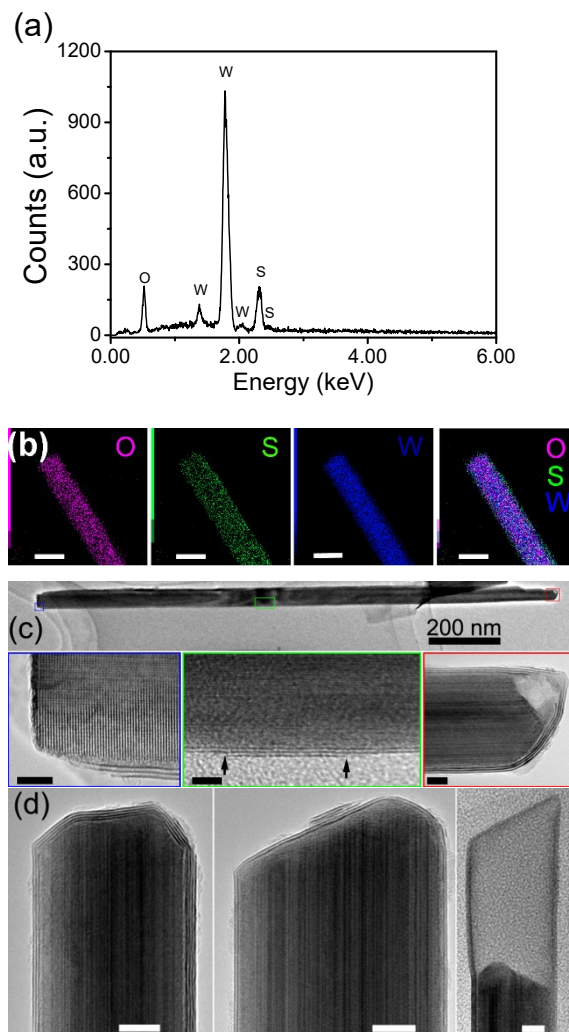

**Fig. S3** (a) EDX spectrum of  $\text{WS}_2$ -based nanostructure film, (b) EDS elemental mappings of a  $\text{WO}_x$ -filled  $\text{WS}_2$  nanotube (scale bars: 100 nm), (c) TEM image of a  $\text{WO}_x$ -filled  $\text{WS}_2$  nanotube capped at top-end and its corresponding HRTEM images taken on 3 different sections highlighted in blue/green/red frames (scale bars: 5 nm), (d) HRTEM images of  $\text{WO}_x$ -filled  $\text{WS}_2$  capped nanotubes (scale bars: 10 nm).

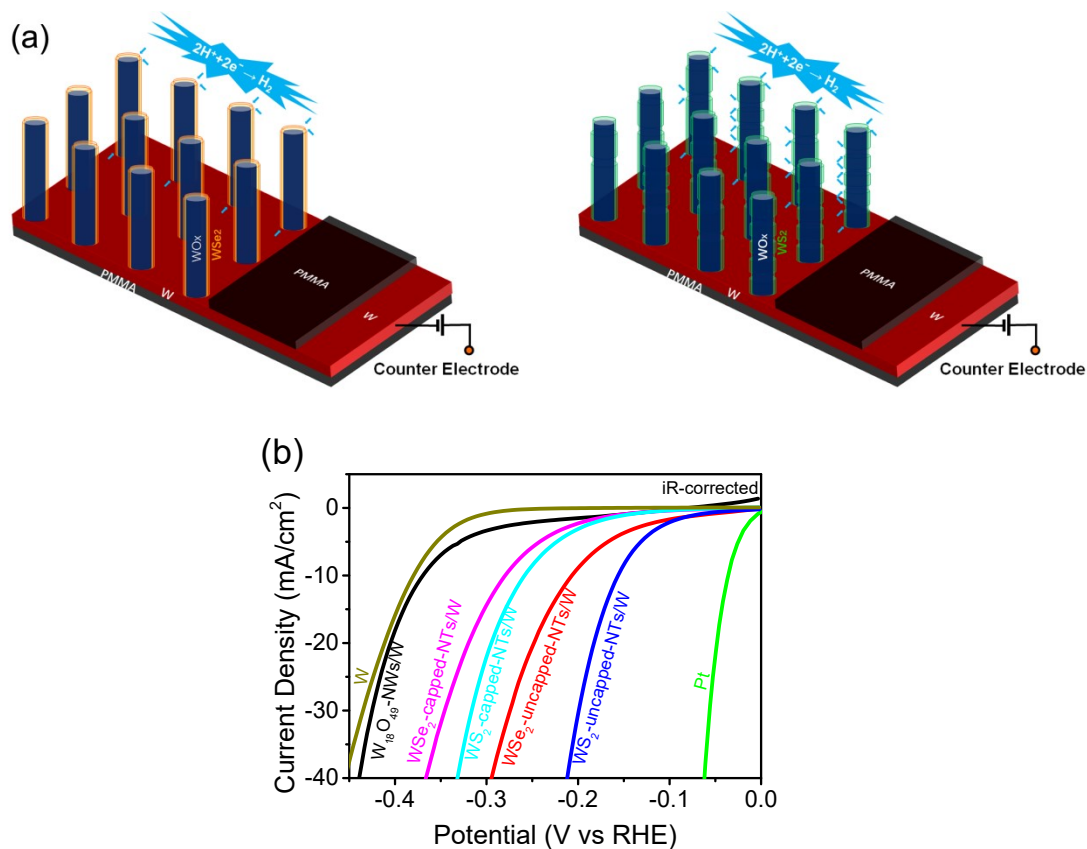

**Fig. S4** (a) Schematic drawings of aligned WSe<sub>2</sub> uncapped nanotube working electrode (Left) and aligned WS<sub>2</sub> uncapped nanotube working electrode (Right), (b) LSV curves at low-currents for different working electrodes.

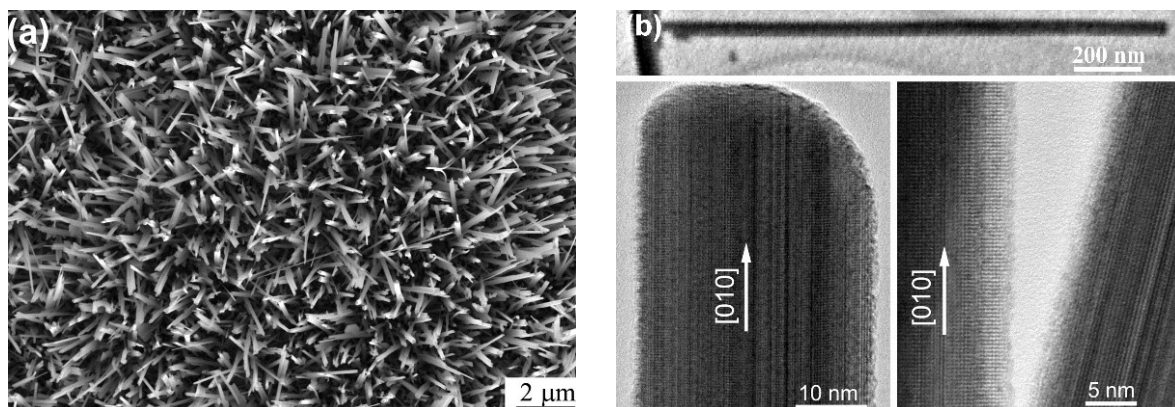

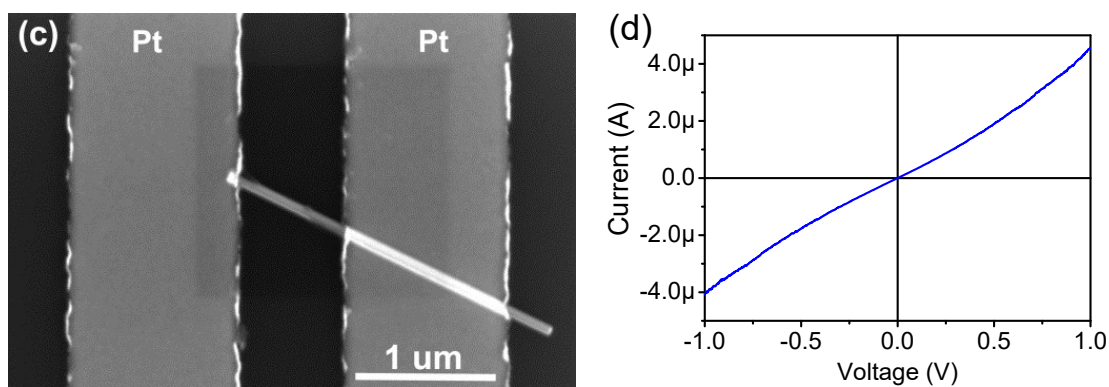

**Fig. S5** (a) SEM image of aligned  $W_{18}O_{49}$  nanowires grown on W substrate, (b) TEM images of  $W_{18}O_{49}$  nanowires, (c) and (d) SEM image and corresponding I-V plot of a two-terminal  $W_{18}O_{49}$  nanowire device.

**Table S1.** Comparison between various TMDs-derived nanocatalysts for HER in 0.5M  $HSO_4$  electrolytes

| TMDs nanostructured catalyst                | Type      | $\eta_{10}$<br>(mV) | Tafel slope<br>(mV/dec) | $J_0 @ 0 V$<br>(mA/cm <sup>2</sup> ) | Refs      |
|---------------------------------------------|-----------|---------------------|-------------------------|--------------------------------------|-----------|
| uncapped $WS_2$ nanotube arrays/W substrate | thin film | 156                 | 85                      | 0.20                                 | This work |
| nanoporous $MoS_2$ /FTO substrate           | thin film | 230                 | 50                      | NA                                   | 12        |
| nanoporous $MoS_2$ /Mo substrate            | thin film | 280                 | 50                      | NA                                   | 13        |
| $WS_2/WO_3$ nanohelices arrays/W substrate  | thin film | 168                 | NA                      | NA                                   | 14        |
| $MoS_2$ - $MoO_3$ nanocables/FTO substrate  | thin film | 240                 | 50-60                   | NA                                   | 16        |
| WSSe nanotubes/carbon fiber                 | thin film | ~270                | 105                     | 0.029                                | 20        |
| $WS_2$ nanosheets/glassy-carbon             | powder    | NA                  | 55                      | 0.02                                 | 8         |
| $WS_2$ nanosheets/rGO                       | powder    | ~270                | 58                      | NA                                   | 9         |
| single-layer MoSSe nanodots                 | powder    | 140                 | 40                      | NA                                   | 10        |
| $WS_2$ nanosheets/mesoporous graphene       | powder    | 117-142             | 56-60                   | NA                                   | 11        |
| $WS_2$ nanoribbons                          | powder    | 225                 | 68                      | 0.01                                 | 26        |

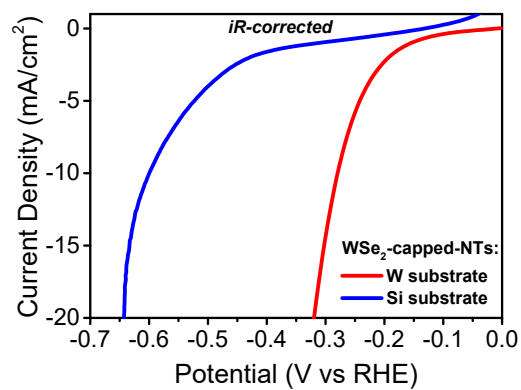

**Fig. S6** LSV curves of WSe<sub>2</sub>-capped-nanotubes thin film catalyst grown on Si/W substrates

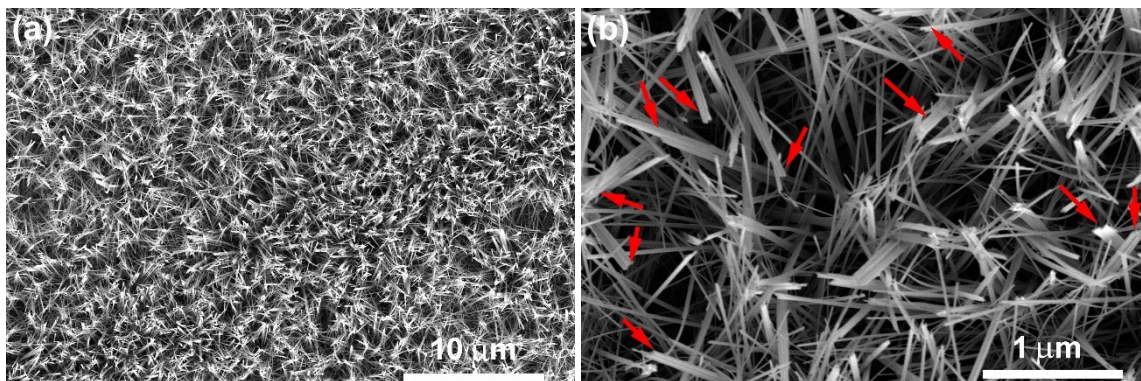

**Fig. S7** SEM images of W-supported WS<sub>2</sub> uncapped nanotubes after electrochemical stability testing

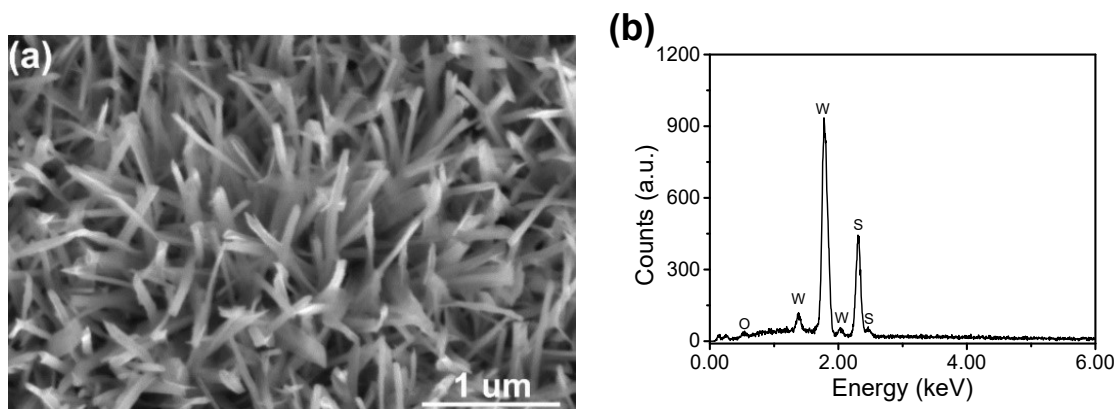

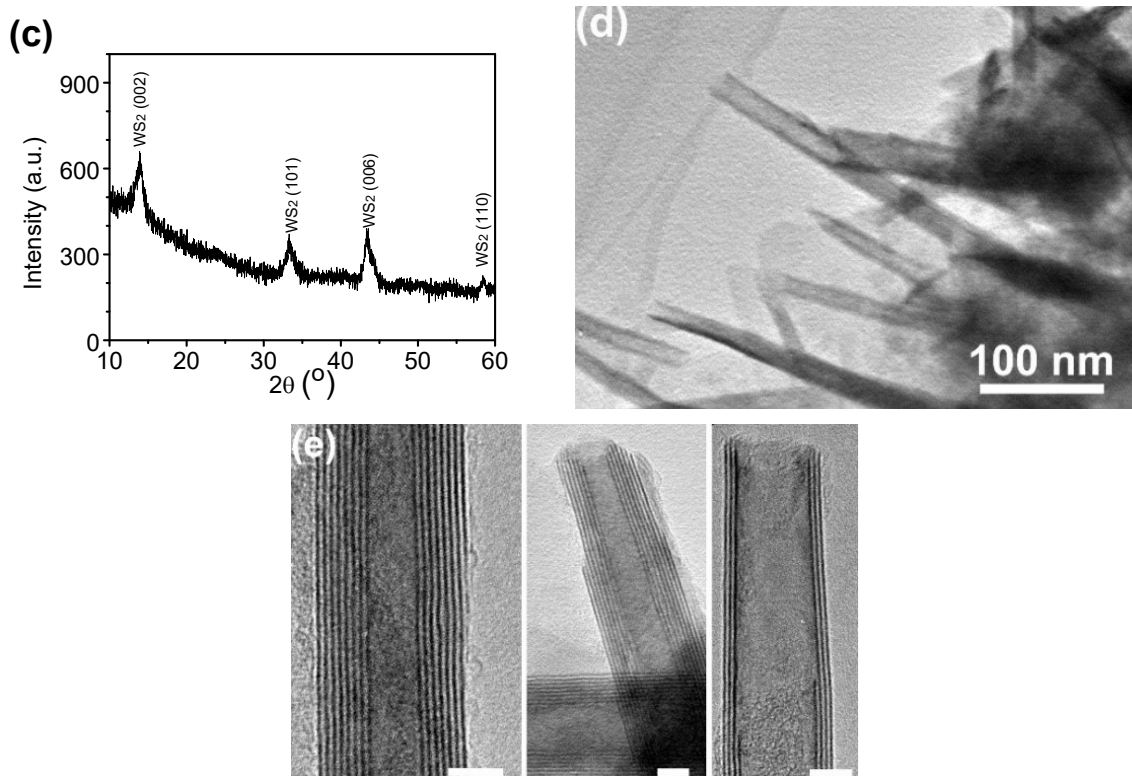

**Fig. S8** (a) SEM image of the film after wet etching in diluted HF etchant, (b) EDS spectrum of remaining one-dimensional nanostructures, (c) GI-XRD spectrum of one-dimensional nanostructures, (d) TEM image of WS<sub>2</sub> nanotubes, (e) HRTEM images of WS<sub>2</sub> nanotubes (scale bars: 5 nm)

To get pure WS<sub>2</sub> nanotubes by removing tungsten sub-oxide cores, as-grown WO<sub>x</sub>-filled WS<sub>2</sub> nanotube film was etched in 3% HF aqueous solution for 24 hours, and subsequently rinsed in deionized water for several times before final blow dry with N<sub>2</sub> gas. One-dimensional nanostructures still remained in approximately vertical alignment after etch (Fig. S8a). As shown in Fig. S8b, very little trace of O element was detected by EDS. XRD spectrum shown in Fig. S8c demonstrated that the film was composed of pure 2H-WS<sub>2</sub> phase, indicating the sub-oxide cores were completely removed. Further TEM characterizations verified the formation of pure WS<sub>2</sub> nanotubes, as seen from the low-magnification TEM image in Fig. S8d. HRTEM images of some individual WS<sub>2</sub> nanotubes are displayed in Fig. S8e, showing their characteristics of broken outmost layer or open-ends.
